# Supplementary material
Source: publisher figshare collection journal article supplement (https://tandf.figshare.com/ndownloader/files/20467764)
Supplement: Supplementary file 1 [file 20467764]

Supporting information

Exploration of the effects of sequence variations between HIV-1 and HIV-2 proteases on their three-dimensional structures

Dhoha Triki1, Maxime Kermarrec2, Benoît Visseaux3, Diane Descamps3, Delphine Flatters2, Anne-Claude Camproux2 and Leslie Regad2*

1 Department of Chemistry, Bioinformatics Research Center, College of Science, North Carolina State University, Raleigh, NC, 27695, USA.

2 Université de Paris, Biologie Fonctionnelle et Adaptative, UMR 8251, CNRS, ERL U1133, INSERM, Computational Modeling of Protein Ligand Interactions, F-75013 Paris, France.

3 IAME, UMR 1137, INSERM, Université Paris Diderot, Sorbonne Paris Cité, AP-HP, Laboratoire de Virologie, Hôpital Bichat, AP-HP, Paris, France.

* corresponding author: leslie.regad@gmail.com

**A) B)**

| | PDB code | Ligands | PR1/PR2 | | --- | --- | --- | | 1HPV | 478 (APV) | PR1 | | 3EKV | | 3NU3 | | 3S45 | PR2 | | 1SDT | MK1 (IDV) | PR1 | | 1HSH_AB | PR2 | | 1HSH_CD | | 2IEN | 017 (DRV) | PR1 | | 4HLA | | 4LL3 | | 3EBZ | PR2 | | 2HB3 | GRL | PR1 | | 3ECO | PR2 | | 2Z4O | 065 | PR1 | | 3ECG | PR2 | | 1HIH | C20 | PR1 | | 1HII | PR2 | | 1HIV | 1ZK | PR1 | | 1IVP | PR2 | | 2NPH | peptide | PR1 | | 2HPE | PR2 | | 2HPF | | 2MIP_AB | | 2MIP_CB | | | 478 (APV)  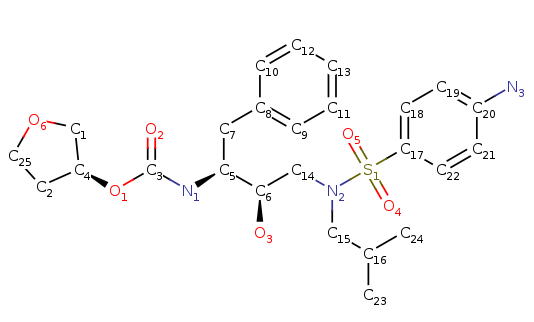 | MK1 (IDV)  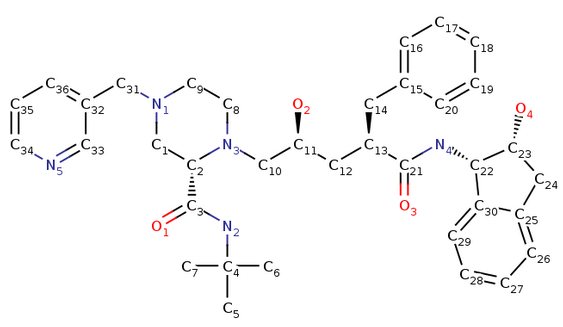 | | --- | --- | | 017 (DRV)  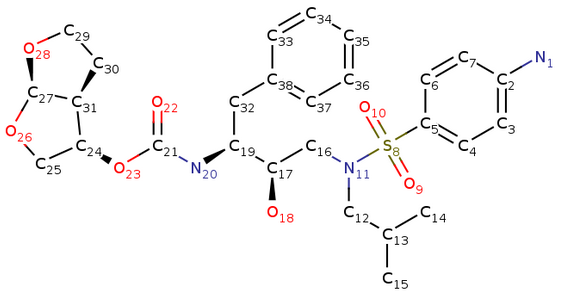 | GRL  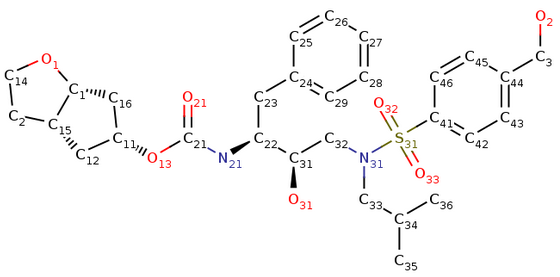 | | 065  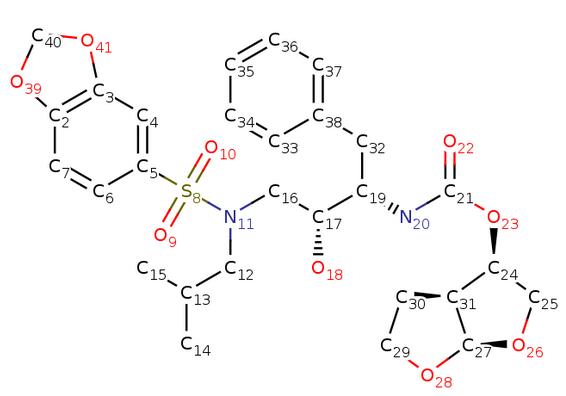 | C20  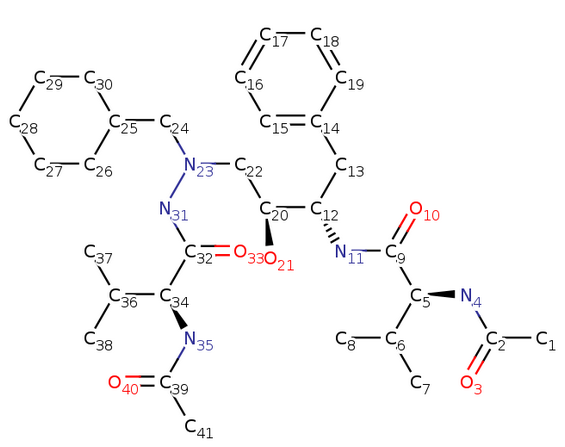 | | 1ZK  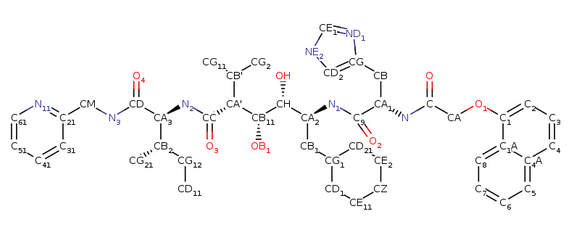 | Peptide (2NPH)  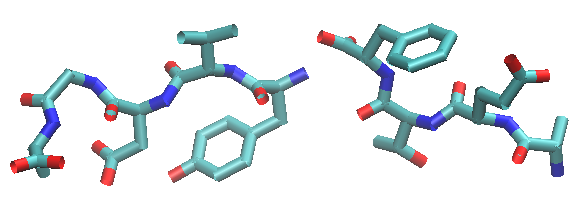  pentapeptide + tetrapeptide  (YVDGA) (AETF) | | Peptide (2HPE)  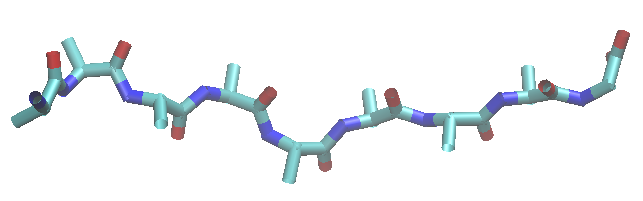  polypeptide(L) backbone of 9 unidentified residues | Peptide (2MIP)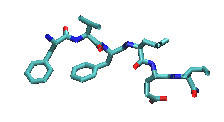  reduced amide inhibitor [BI-LA-398; Phe-Val-Phe-psi (CH2NH)-Leu-Glu-Ile-amide] | | Peptide (2HPF)  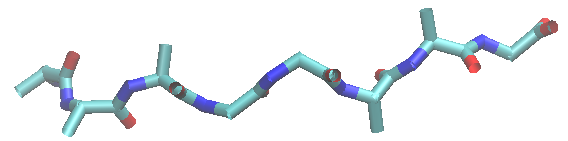  polypeptide(L) backbone of 8 unidentified residues |  | |
| --- | --- | --- | --- | --- | --- | --- | --- | --- | --- | --- | --- | --- | --- | --- | --- | --- | --- | --- | --- | --- | --- | --- | --- | --- | --- | --- | --- | --- | --- | --- | --- | --- | --- | --- | --- | --- | --- | --- | --- | --- | --- | --- | --- | --- | --- | --- | --- | --- | --- | --- | --- | --- | --- | --- | --- | --- | --- | --- | --- | --- | --- | --- | --- | --- |

**Table S1. Presentation of the PR dataset.** A) Description of the PR set.For chemical molecule, the ligand name corresponds to thePDB HETATM code. When the ligand is a FDA-approved drug, the name of the drug is provided in brackets. B) Representation of the 11 different ligands. Image of chemical molecules were extracted from the PDB (2D diagram of small molecules (ligands)). Peptide images were drawn using VMD software using bonds representation and were coloured by elements.


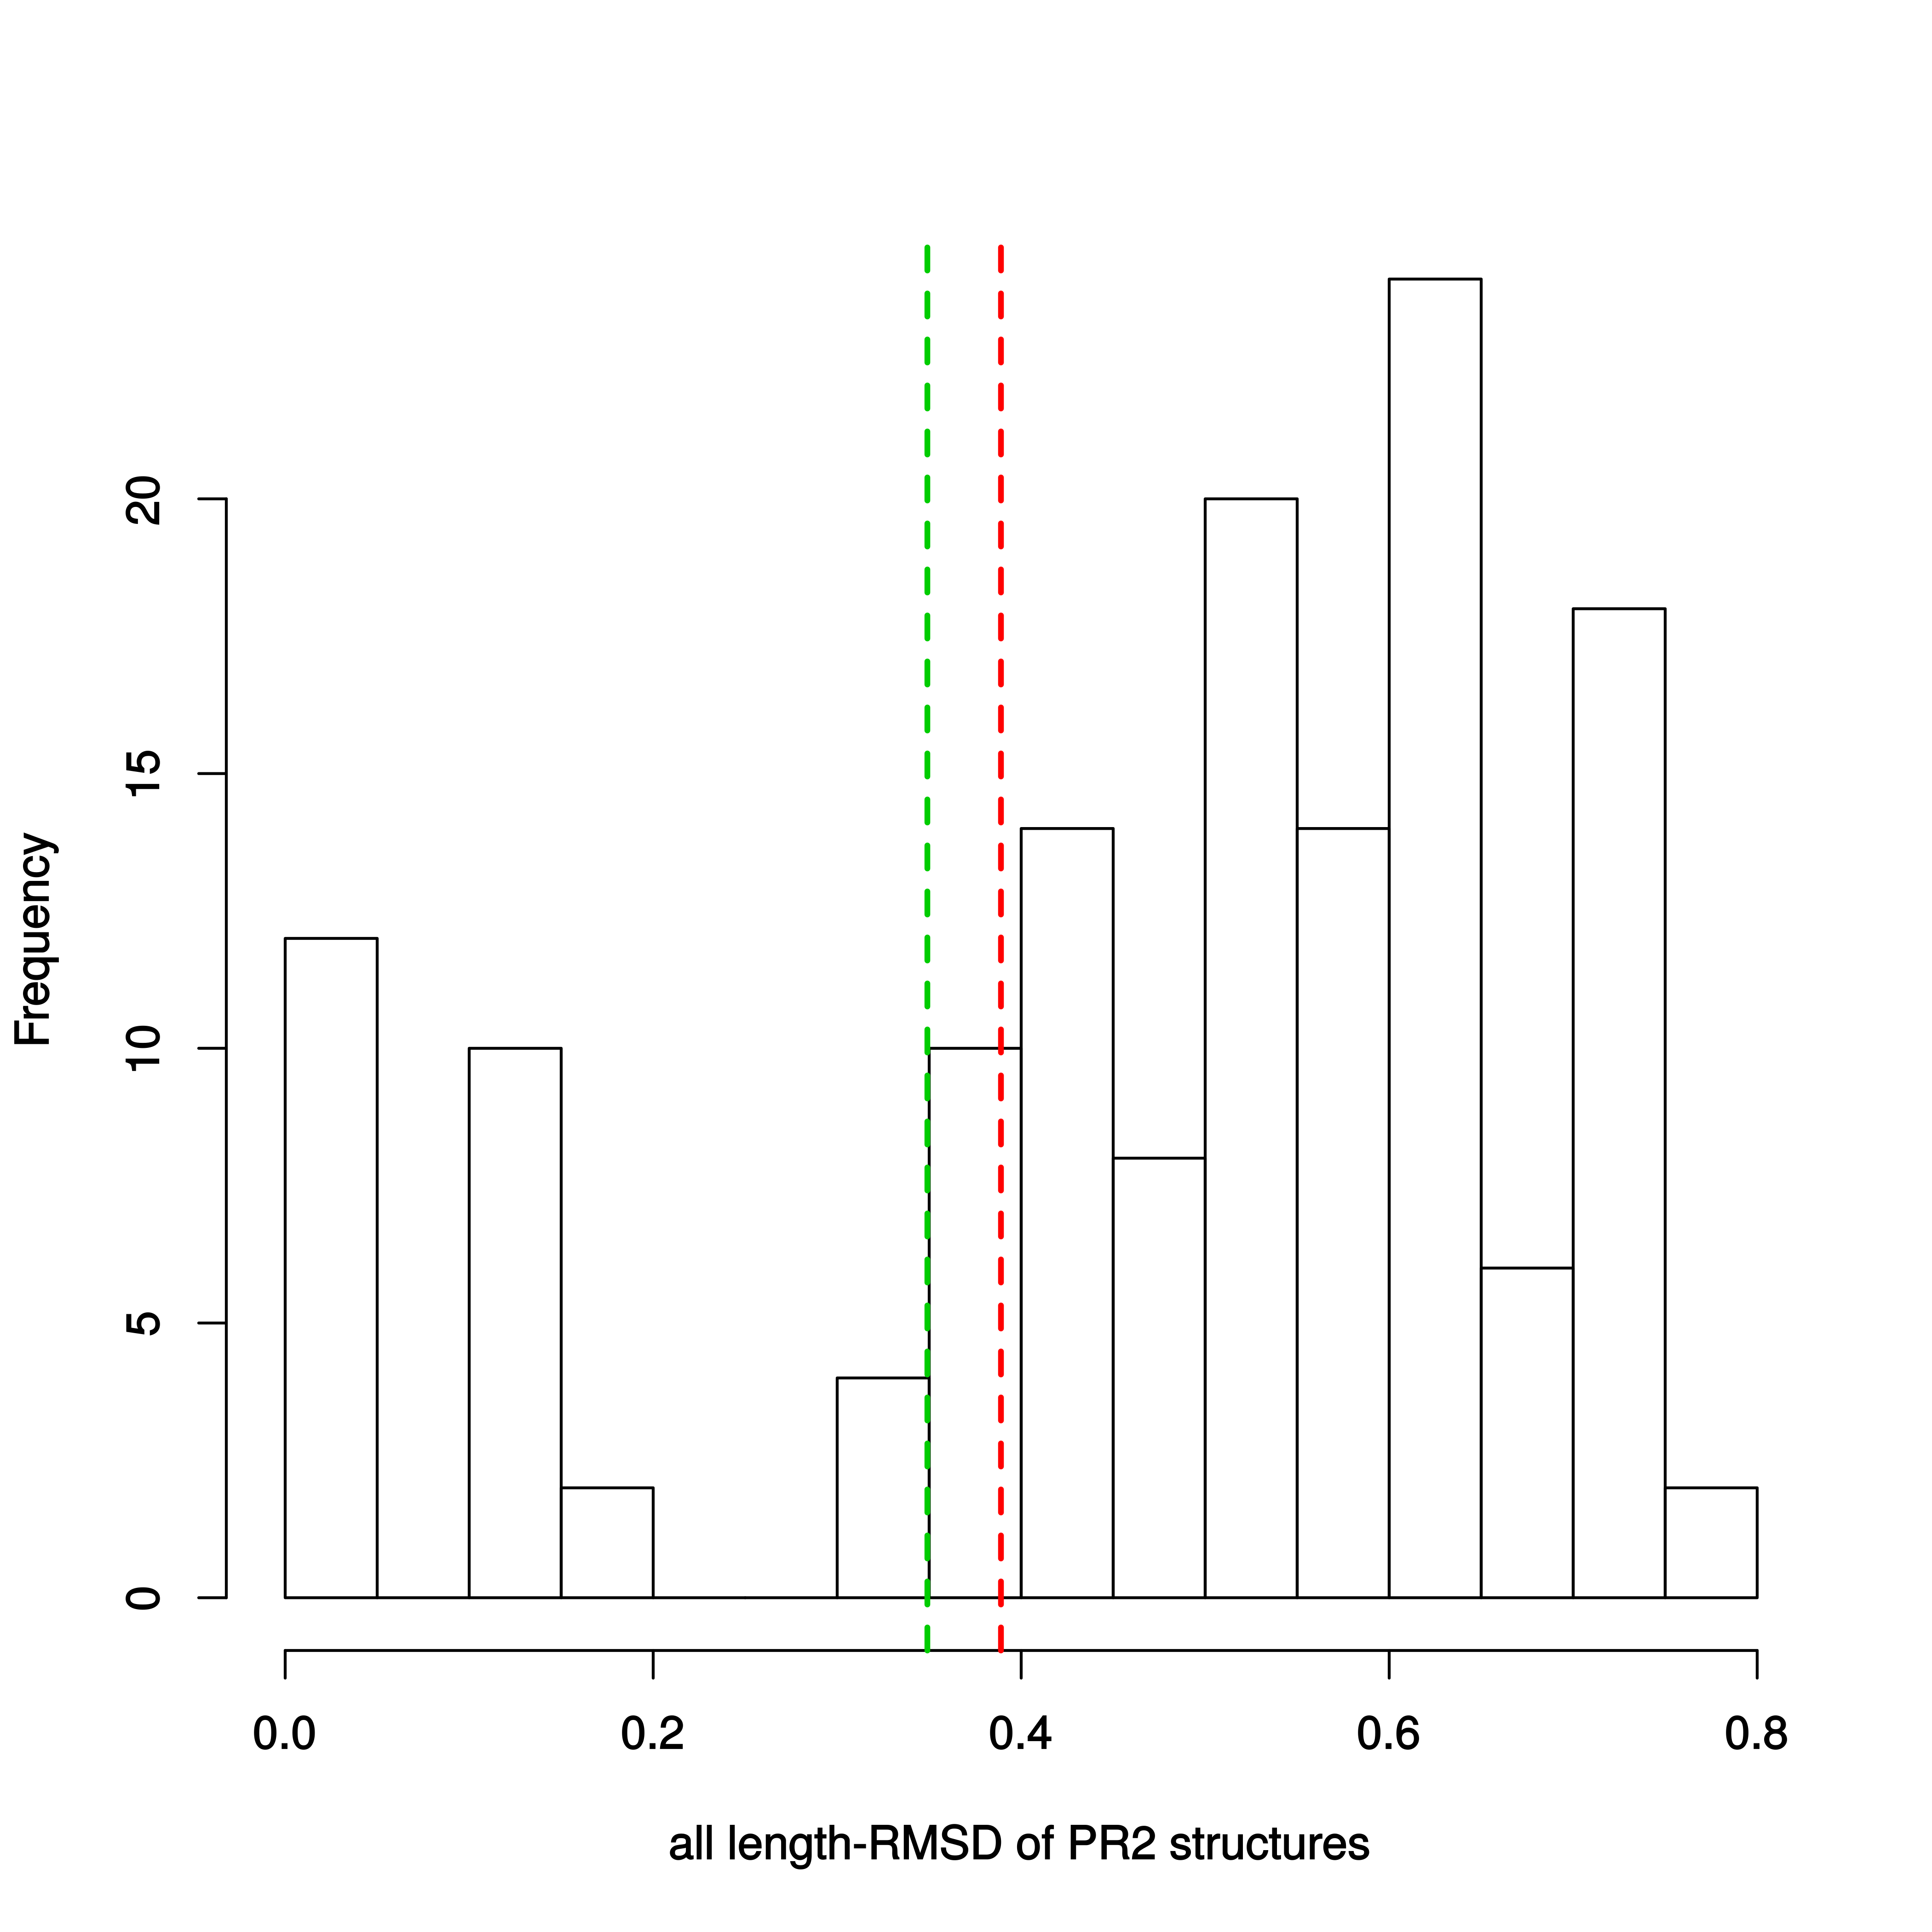


**FIGURE S1. Distribution of the all-length RMSD between PR2 structures.** All-length RMSD values (in Å) were computed between all PR2 pairs based on the backbone atoms. The red dashed line corresponds to the all-length RMSD value of 0.35 Å computed between the two dimers (2MIP_AB and 2MIP_CD) present in the 2MIP structure. The green dashed line corresponds to the all-length RMSD value of 0.39 Å computed between the two dimers (1HSH_AB and 1HSH_CD) present in the 1HSH structure.

**
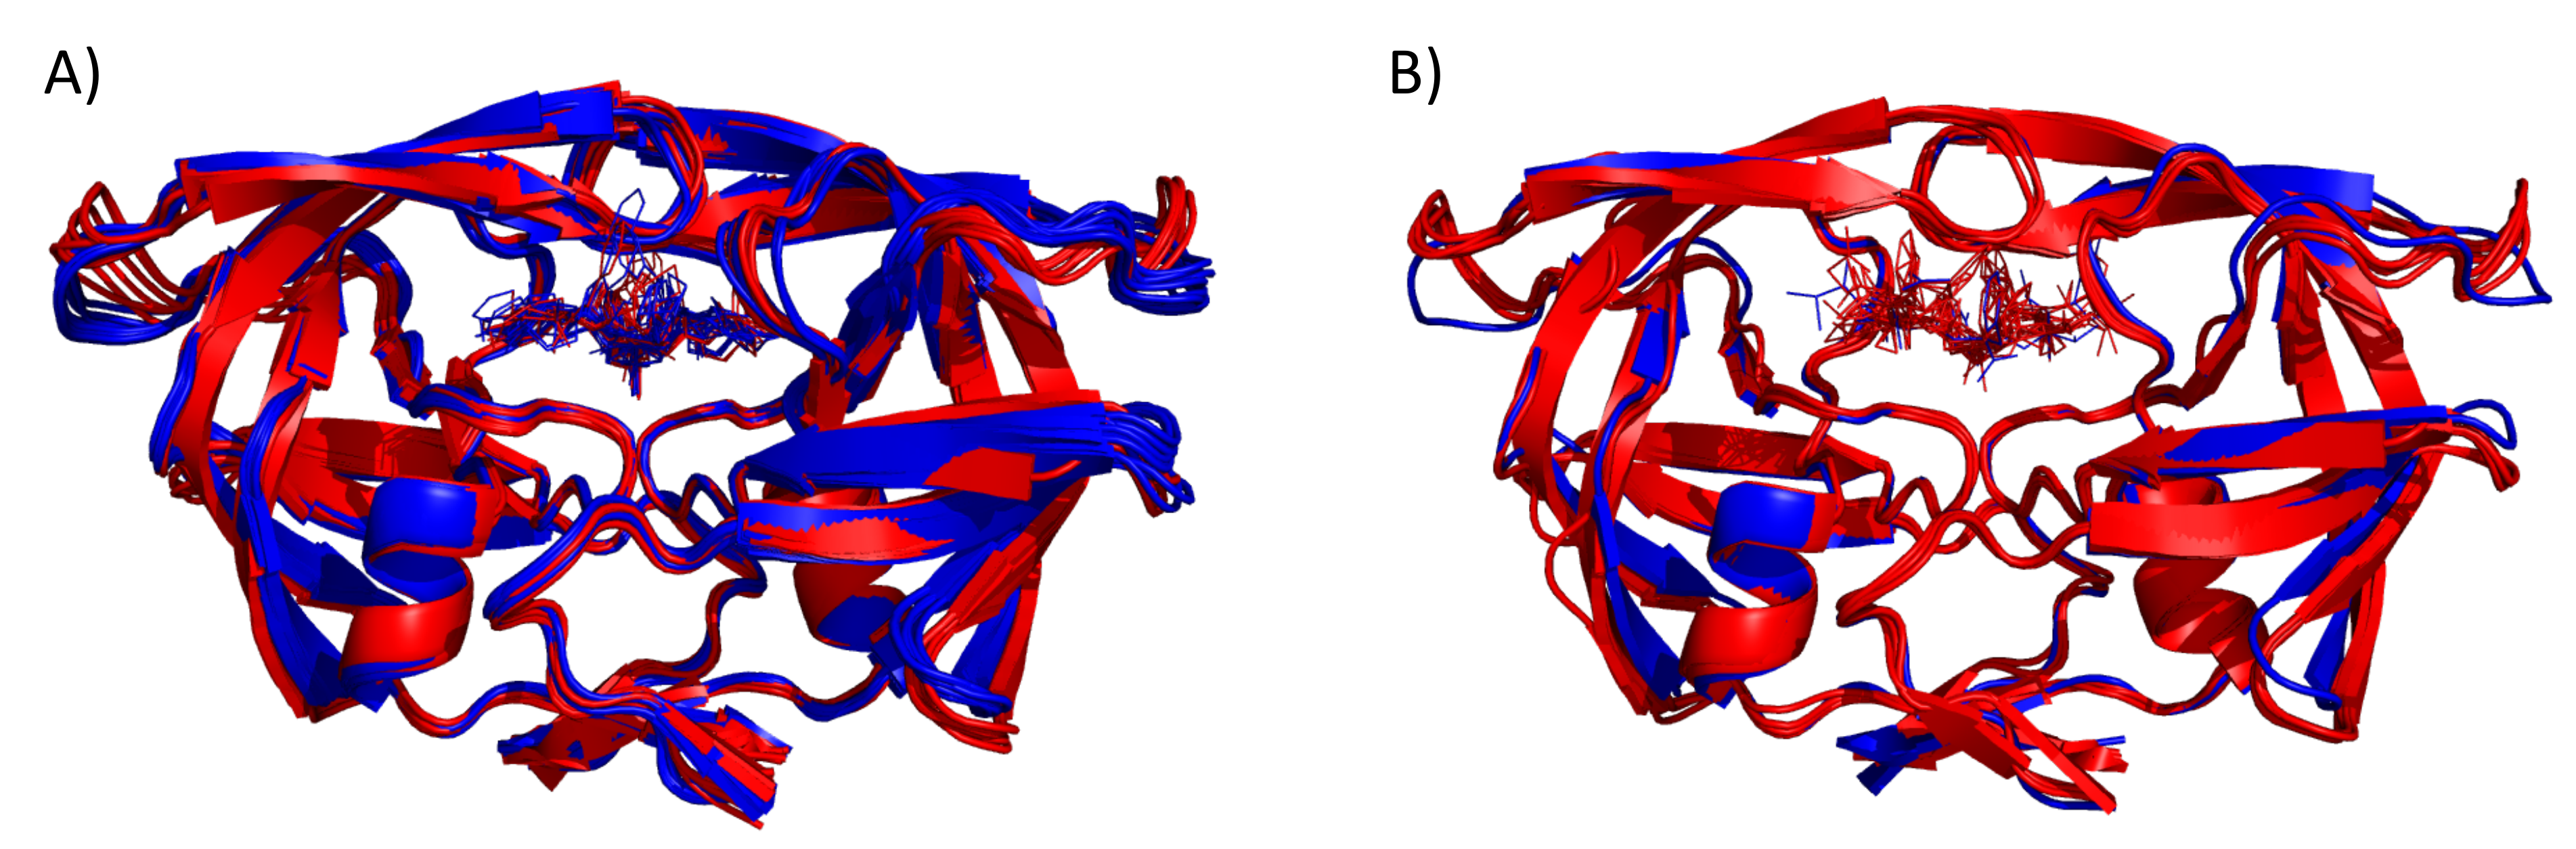
**

**FIGURE S2. Superimposition of the PR1 and PR2 structures.** (A) Superimposition of PR1 and PR2 structures in complex with small molecules. (B) Presentation of the PR1 and PR2 structures in complex with peptides. PR structures are displayed as cartoons and coloured according to PR type. PR1 and PR2 structures are coloured in blue and red, respectively.

**
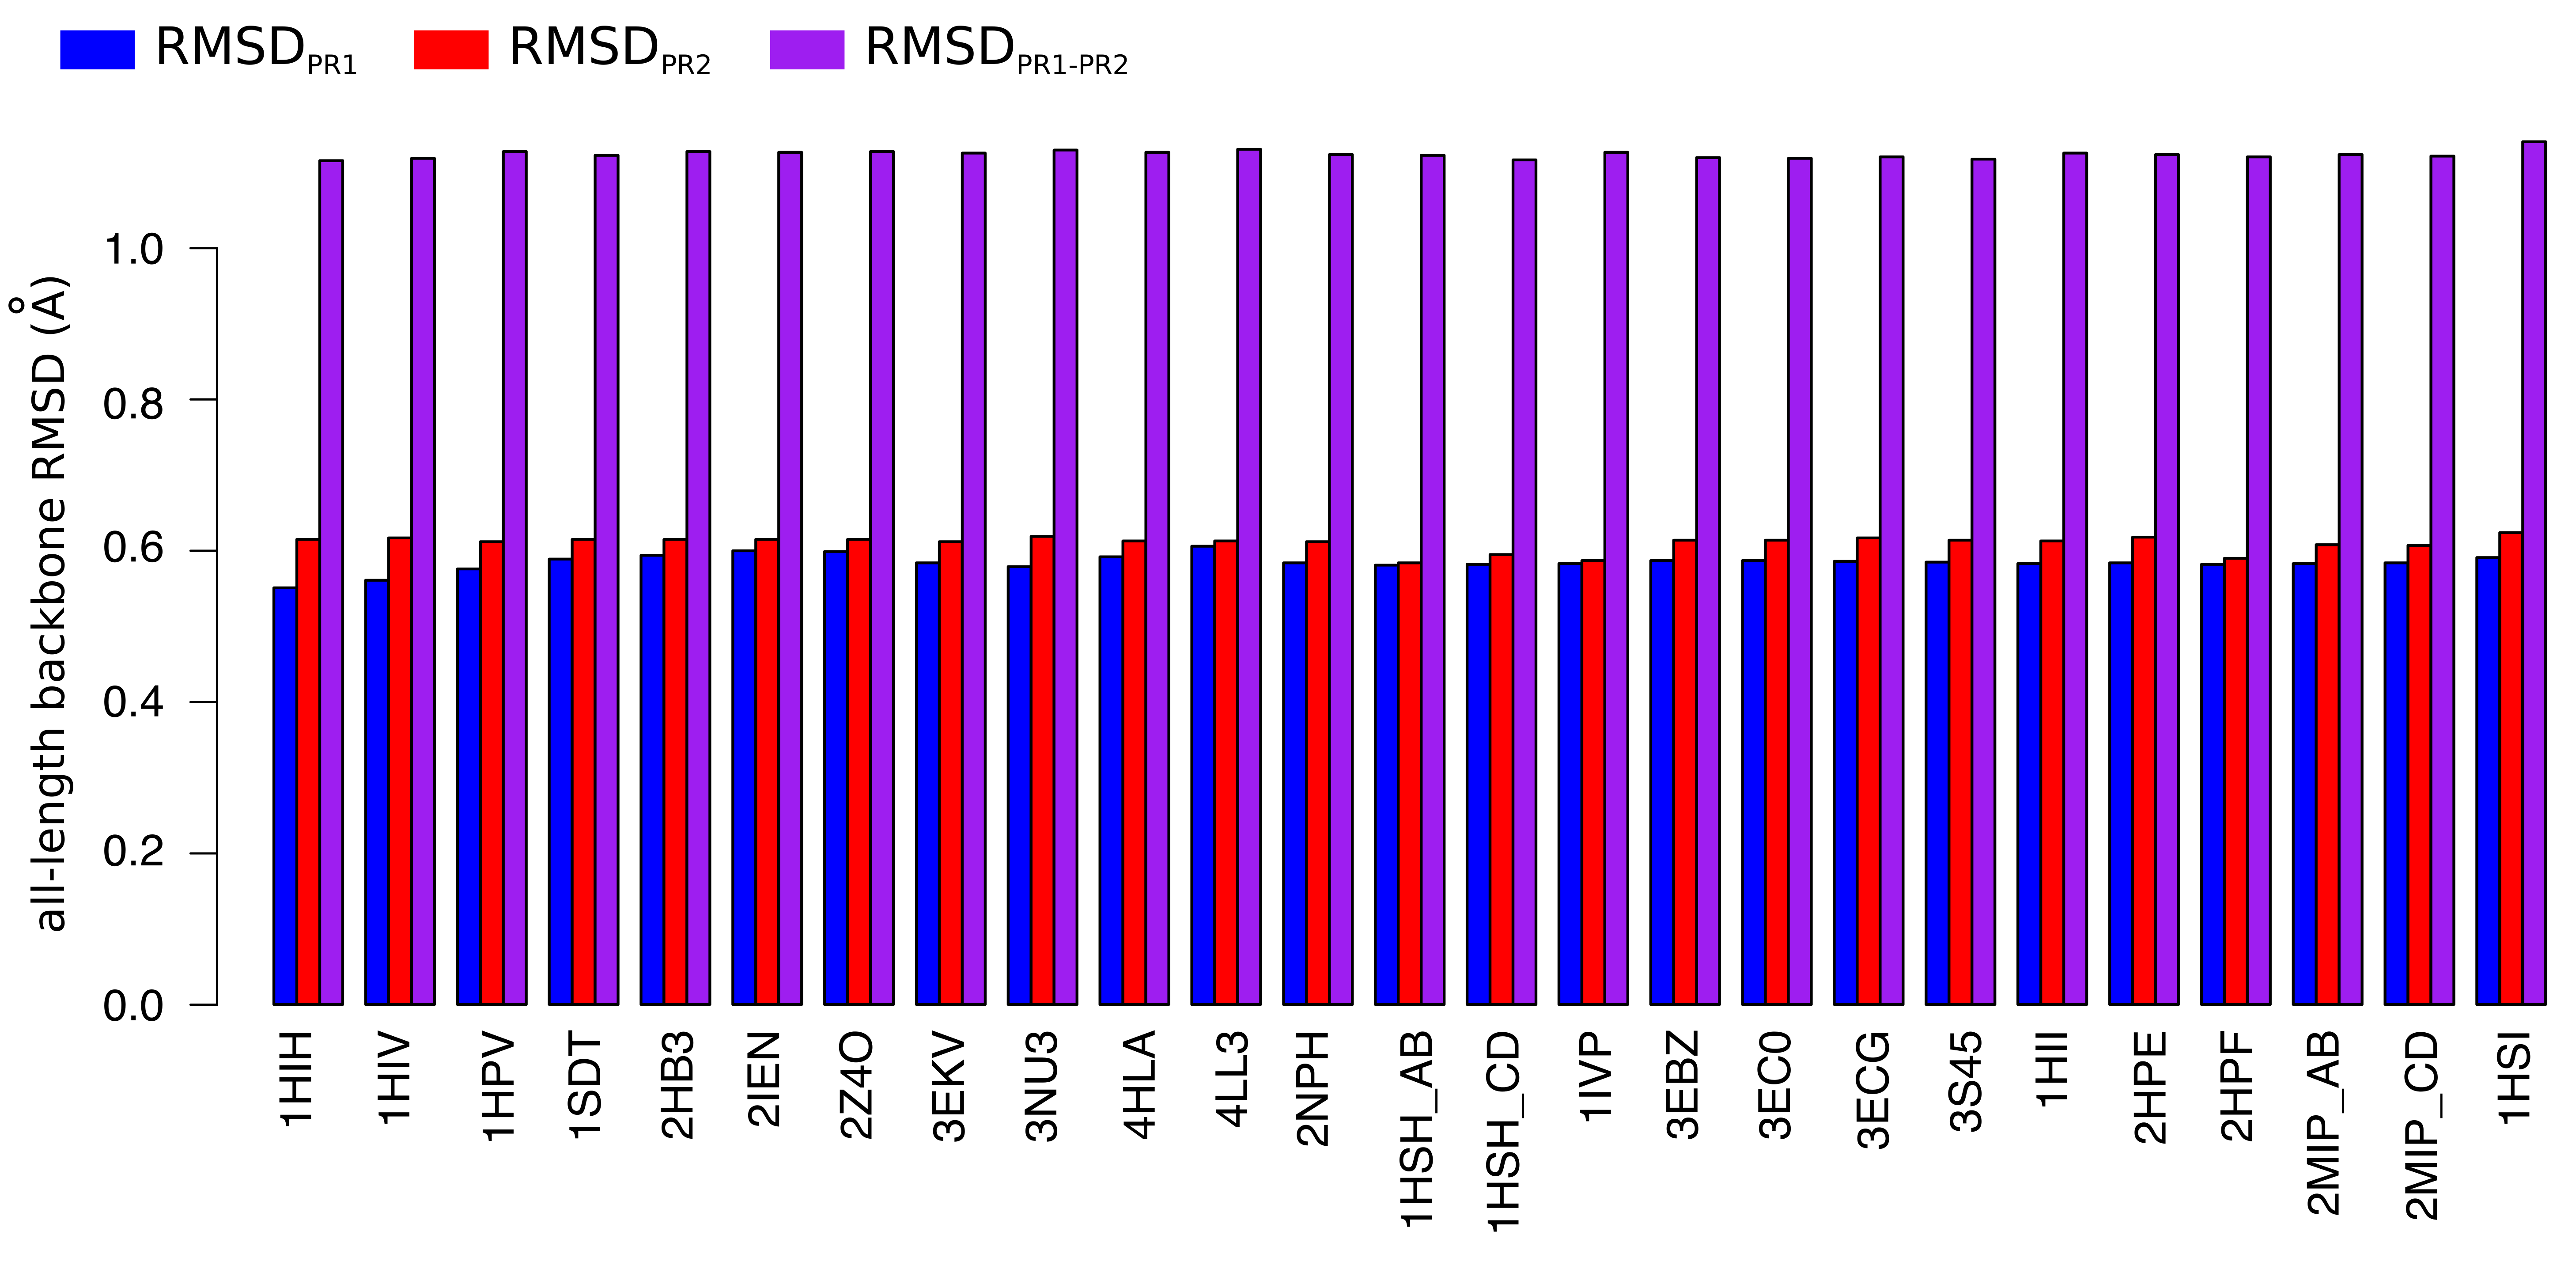
**

**FIGURE S3. Impact of the superimposition reference in the computation of all length-RMSD.**

Each structure was used as reference during the superimposition of structures, resulting in a total of 25 reference structures presented in the X axis. For each reference structure, we then computed the average all length-RMSD between all superimposed structures. These values were plotted for each reference structure. RMSD between all PR structures is represented in purple bars, RMSD between PR2 structures is represented in red bars, and RMSD between PR1 structures is represented in blue bars.

**

**

**FIGURE S4. Impact of the superimposition reference in the computation of region RMSD values.**. For each region, the local RMSD (in Å) was computed with changing the PR structure reference during the superimposition of PR structures. A total of 25 references are shown for each set of superimposed structures and for the 13 regions. We computed the average RMSD values (in Å) between regions extracted from superimposed structures. These values were plotted for each reference structure. RMSD between all PR structures is represented in purple bars, RMSD between PR2 structures is represented in red bars, and RMSD between PR1 structures is represented in blue bars.

**
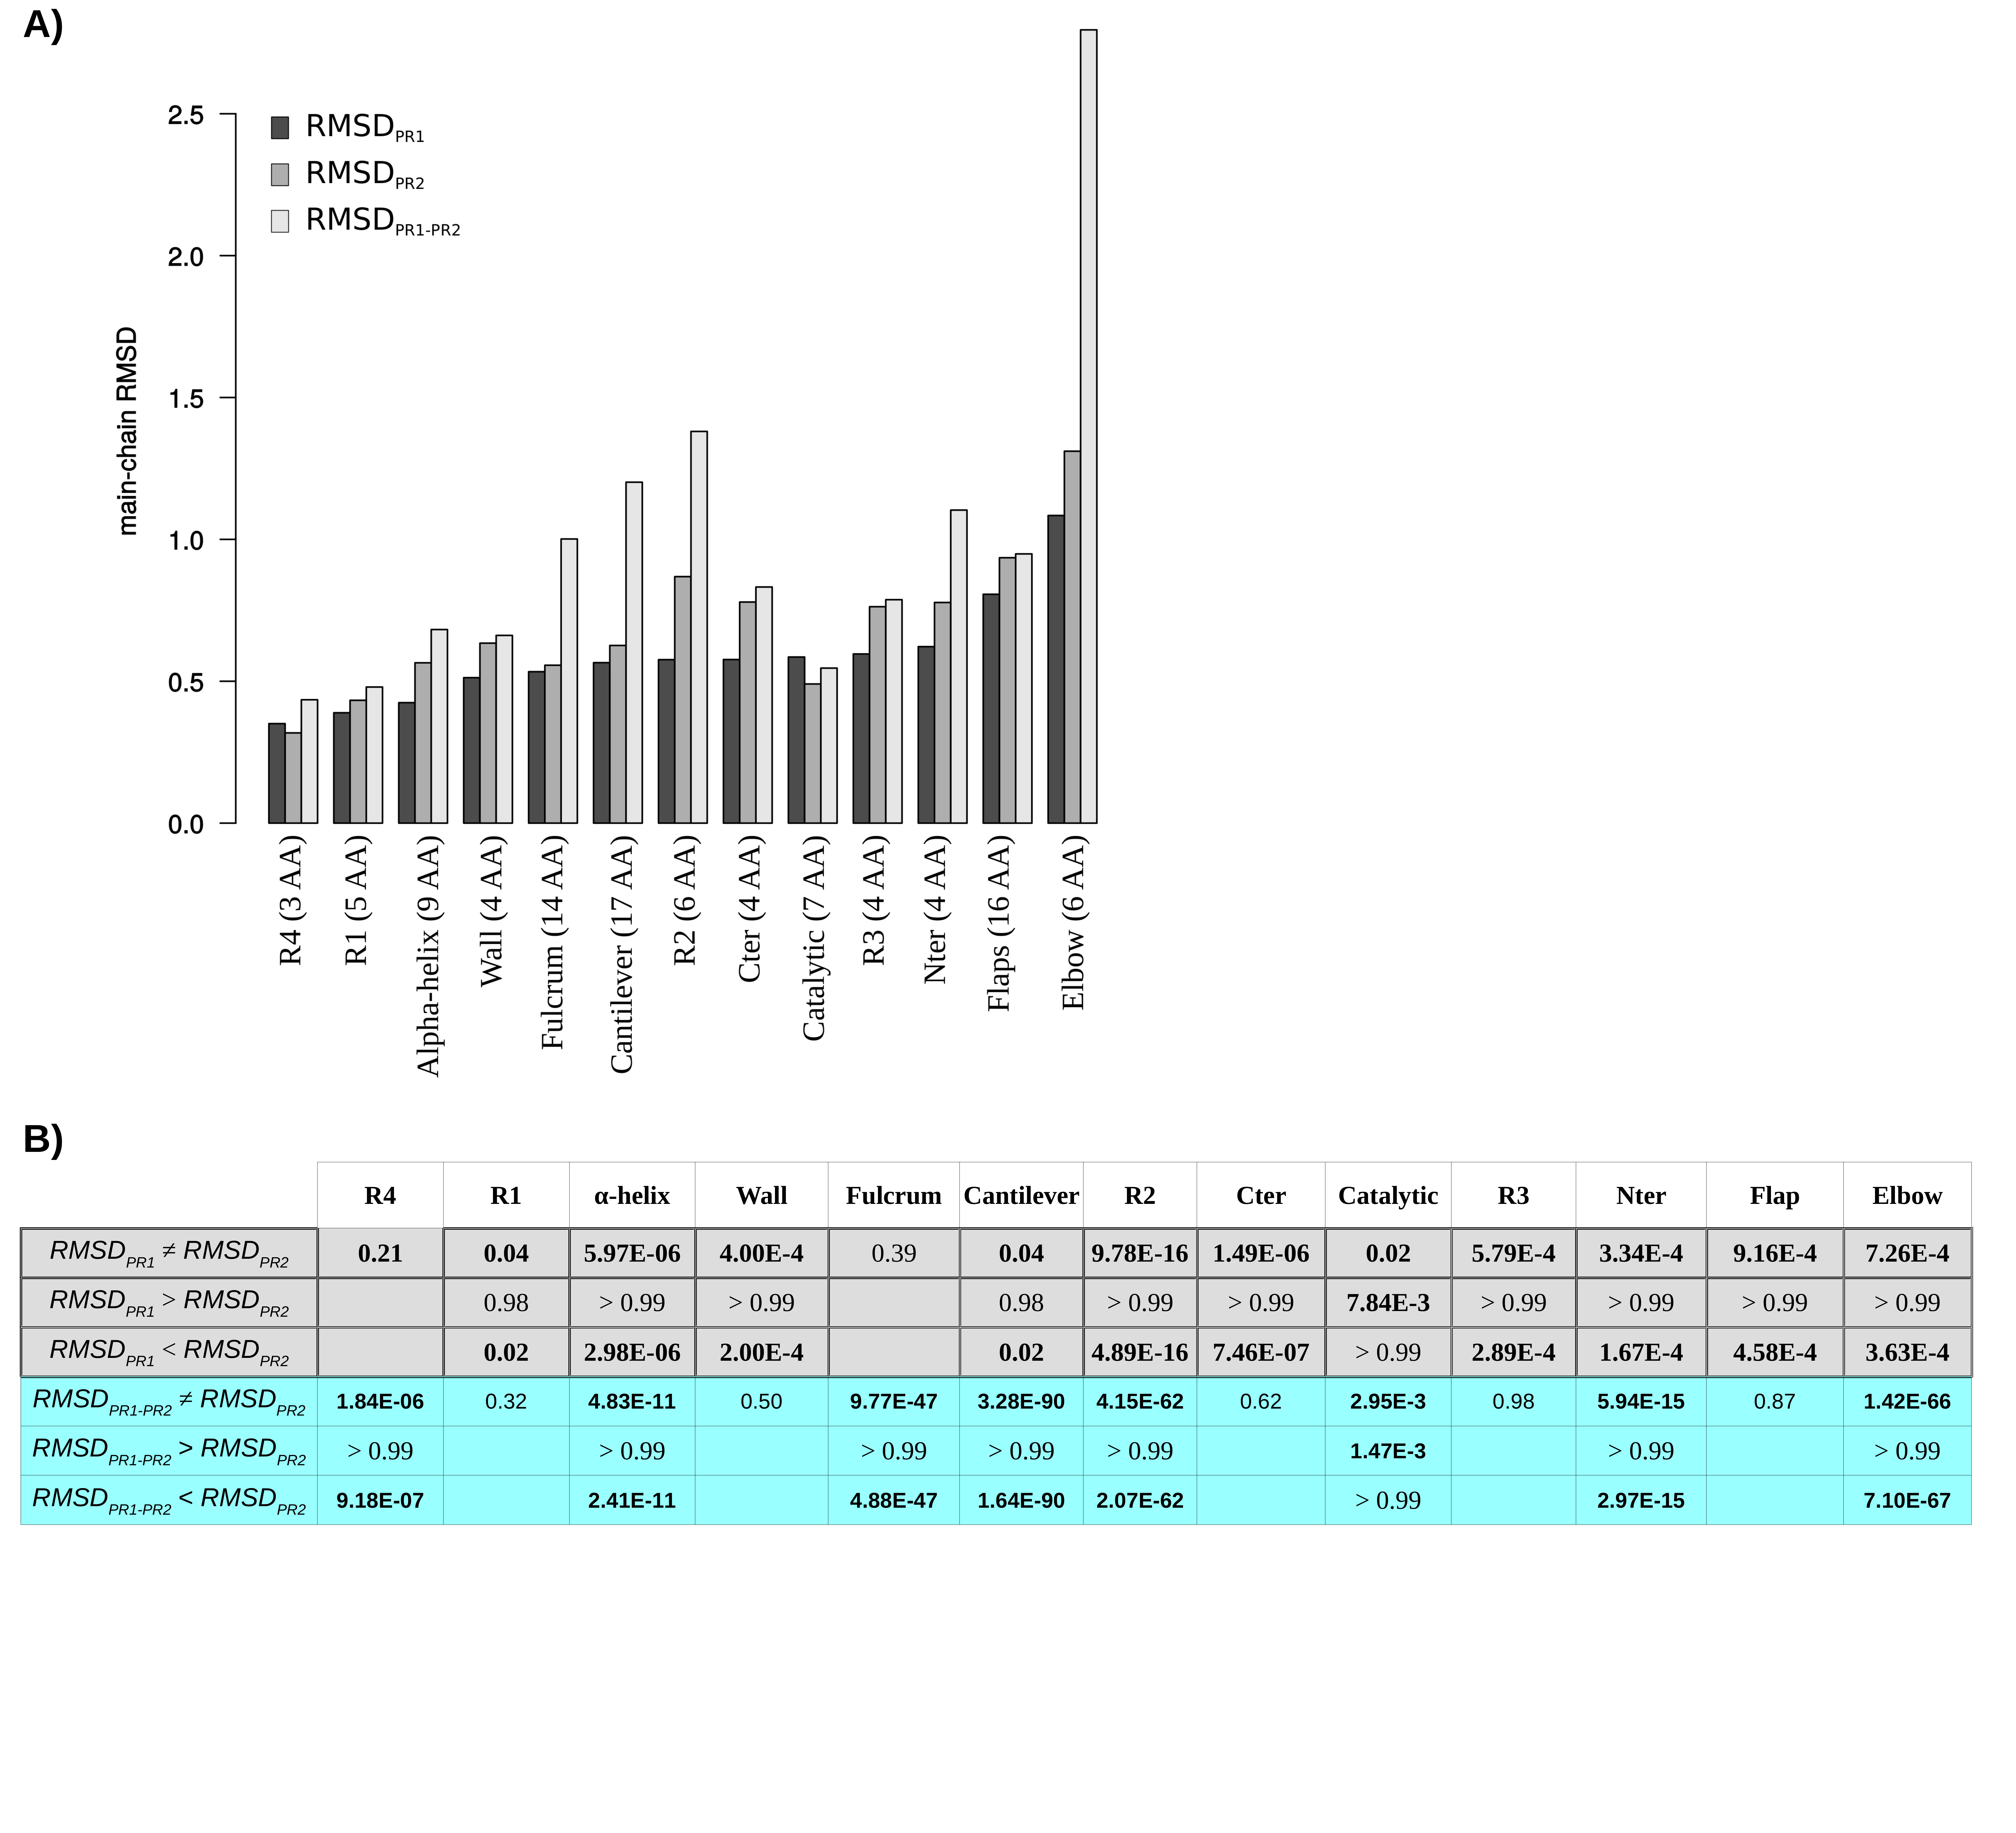
**

**FIGURE S5. Quantification and comparison of the structural variability of the 13 PR chain B regions.** (A) Distribution of the average *RMSDPR1*, *RMSDPR2*, and *RMSDPR1-PR2* values (in Å) for each region. The average *RMSDPR1* and *RMSDPR2* values quantify the intra-structural variability of each region in the PR1 and PR2 sets, respectively. *RMSDPR1-PR2* values quantify the inter-structural variability of each region between the PR1 and PR2 sets. The size of each region in terms of number of amino acids (AA) is indicated in brackets. (B) Comparison of the intra- and inter-structural variabilities of each region of chain B. The table provides the p-value of the t-tests, allowing comparison of average *RMSDPR1*, *RMSDPR2*, and *RMSDPR1-PR2* values. For comparison of the average *RMSDPR1* and *RMSDPR2* values, we performed a t-test using the two-sided alternative hypothesis (*RMSDPR1* ≠ *RMSDPR2*, first line), the greater alternative hypothesis (*RMSDPR1* > *RMSDPR2*, second line), and the less alternative hypothesis (*RMSDPR1* < *RMSDPR2*, third line). For comparison of the average *RMSDPR1-PR2* and *RMSDPR1* values, two t-tests were performed using the two-sided alternative hypothesis (*RMSDPR1-PR2* ≠ *RMSDPR2*, fourth line): greater alternative hypothesis (*RMSDPR1-PR2* > *RMSDPR2*, fifth line) and less alternative hypothesis (*RMSDPR1-PR2* < *RMSDPR2*, sixth line).

**
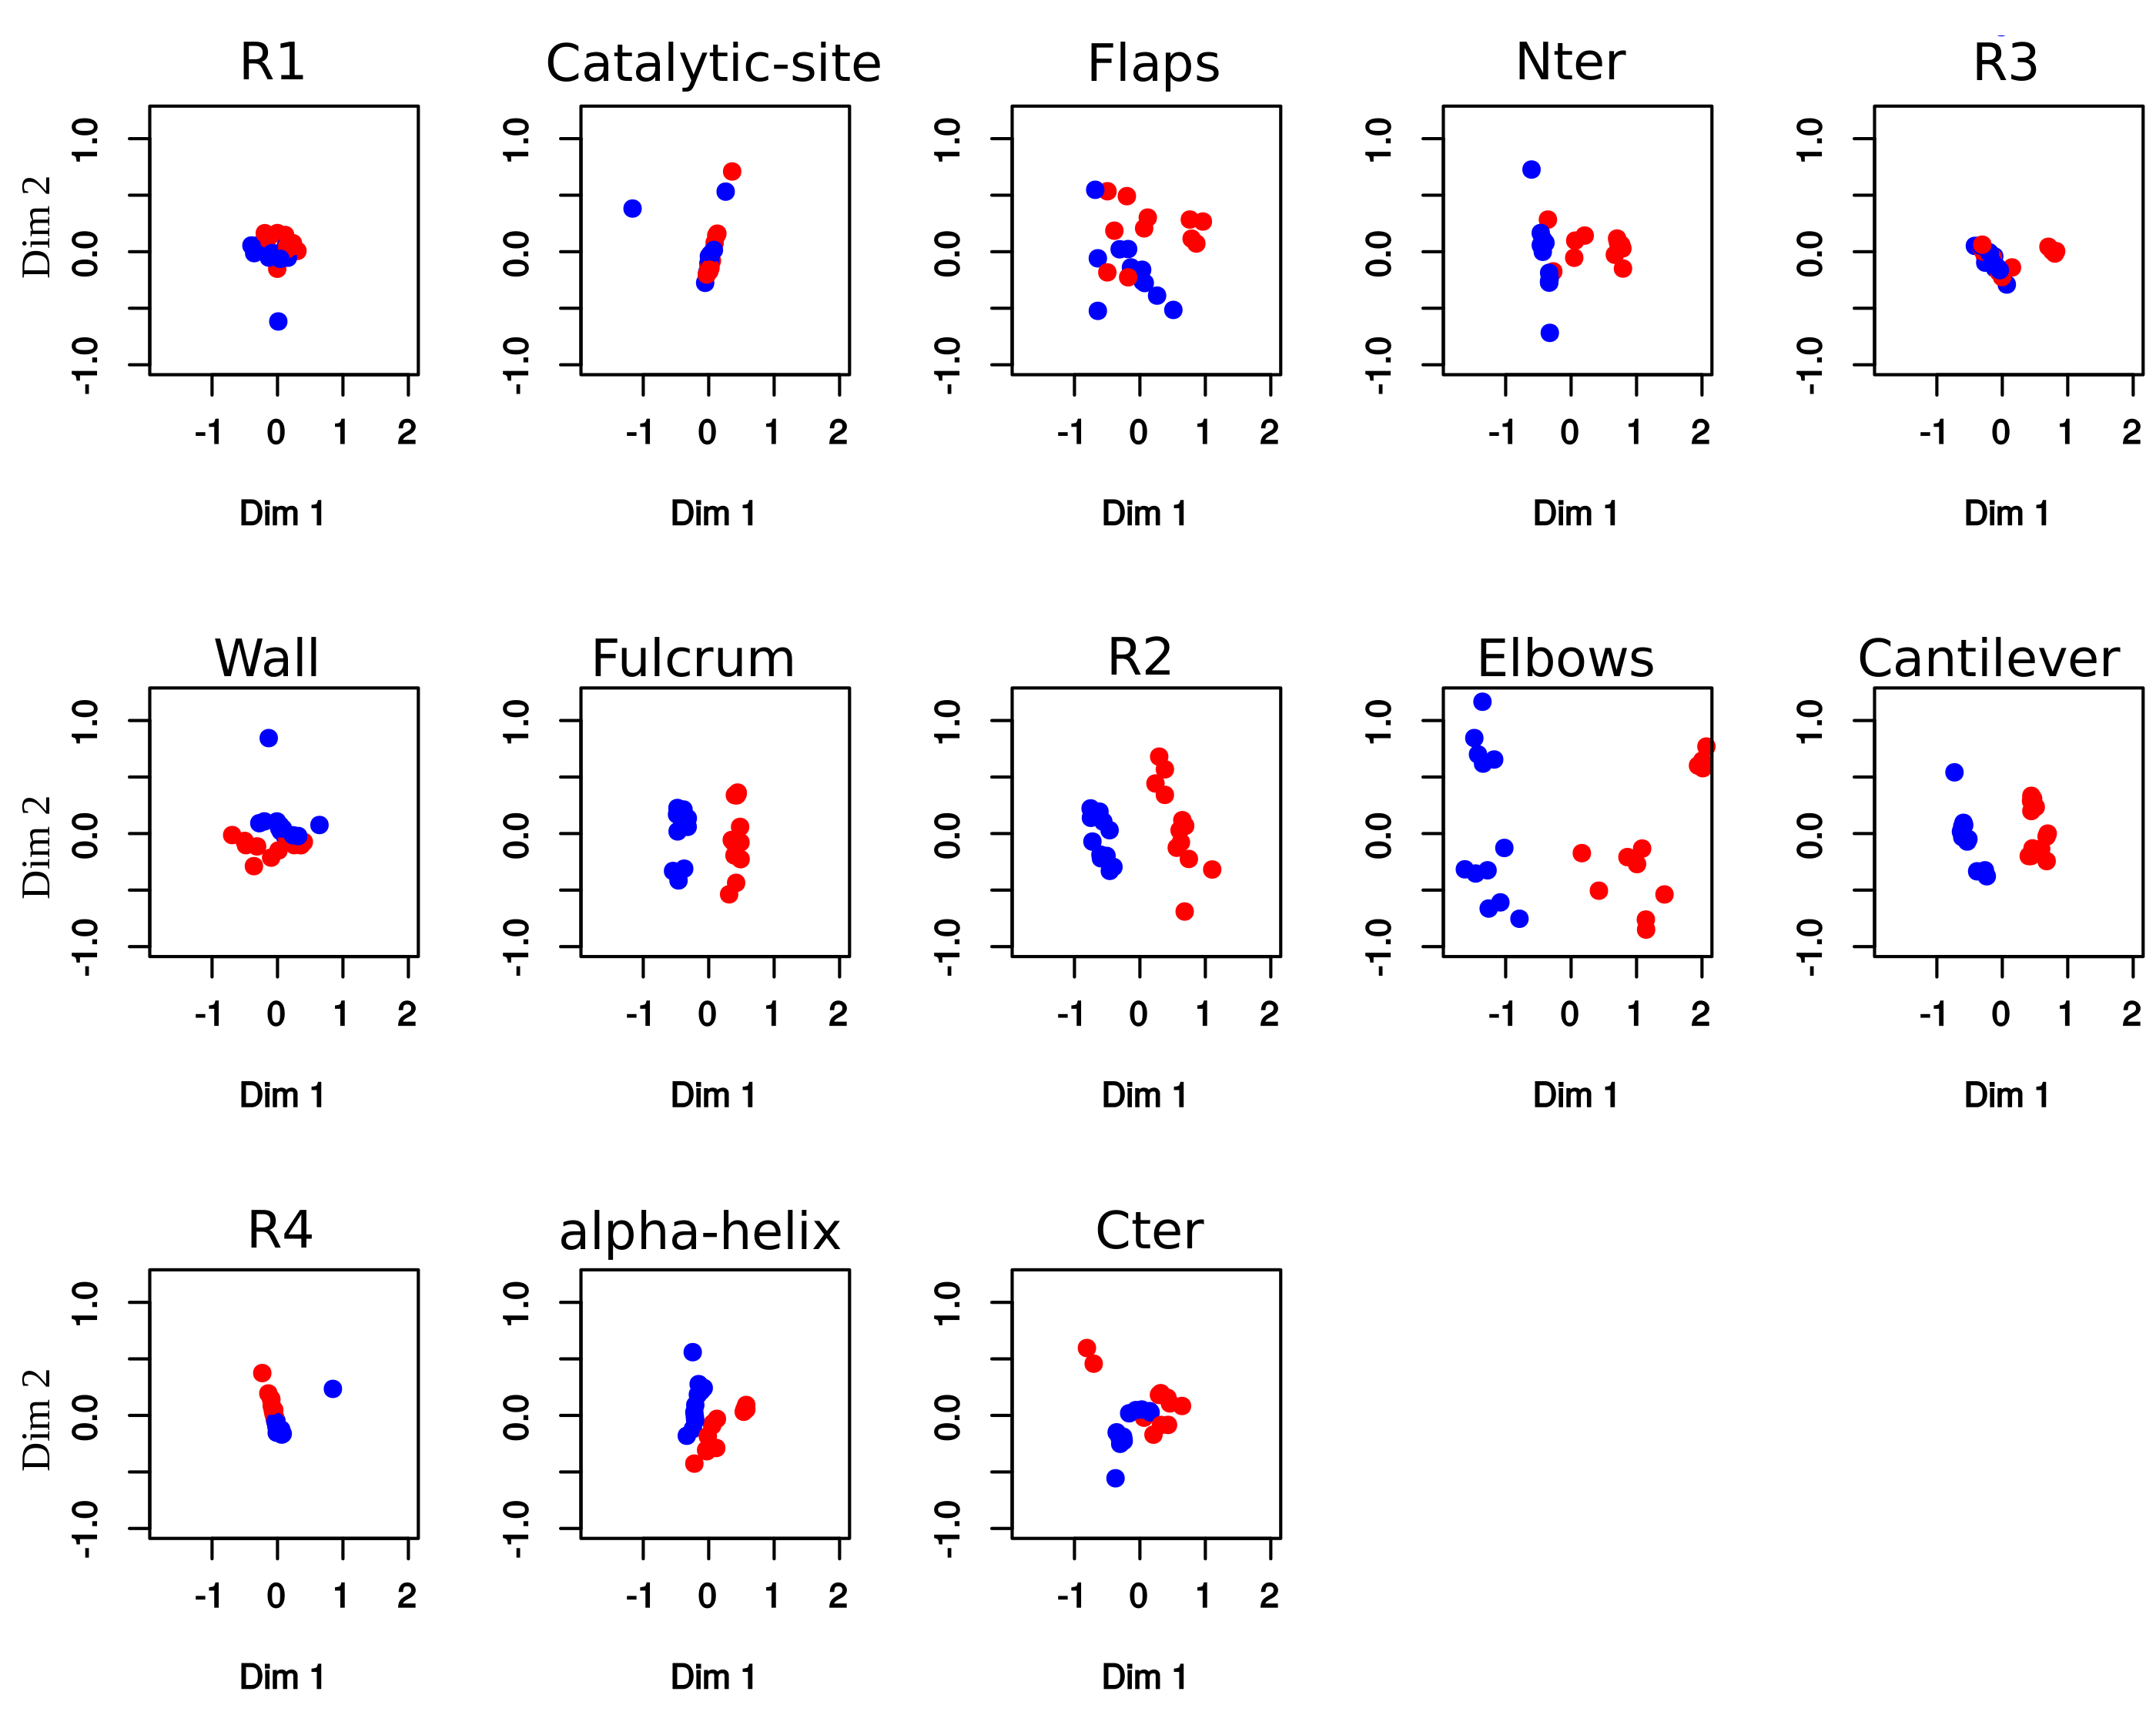
**

**FIGURE S6. MDS maps of the ensemble of conformations of the thirteen regions of chain B in the PR1 and PR2 sets**. The distance in RMSD between each pair of conformations is projected onto two dimensions, retaining relative distance relationships so that two structurally similar conformations tend to be located near each other. Regions respectively. The conformations extracted from PR1 structures correspond to blue dots, and those extracted from PR2 correspond to red dots.


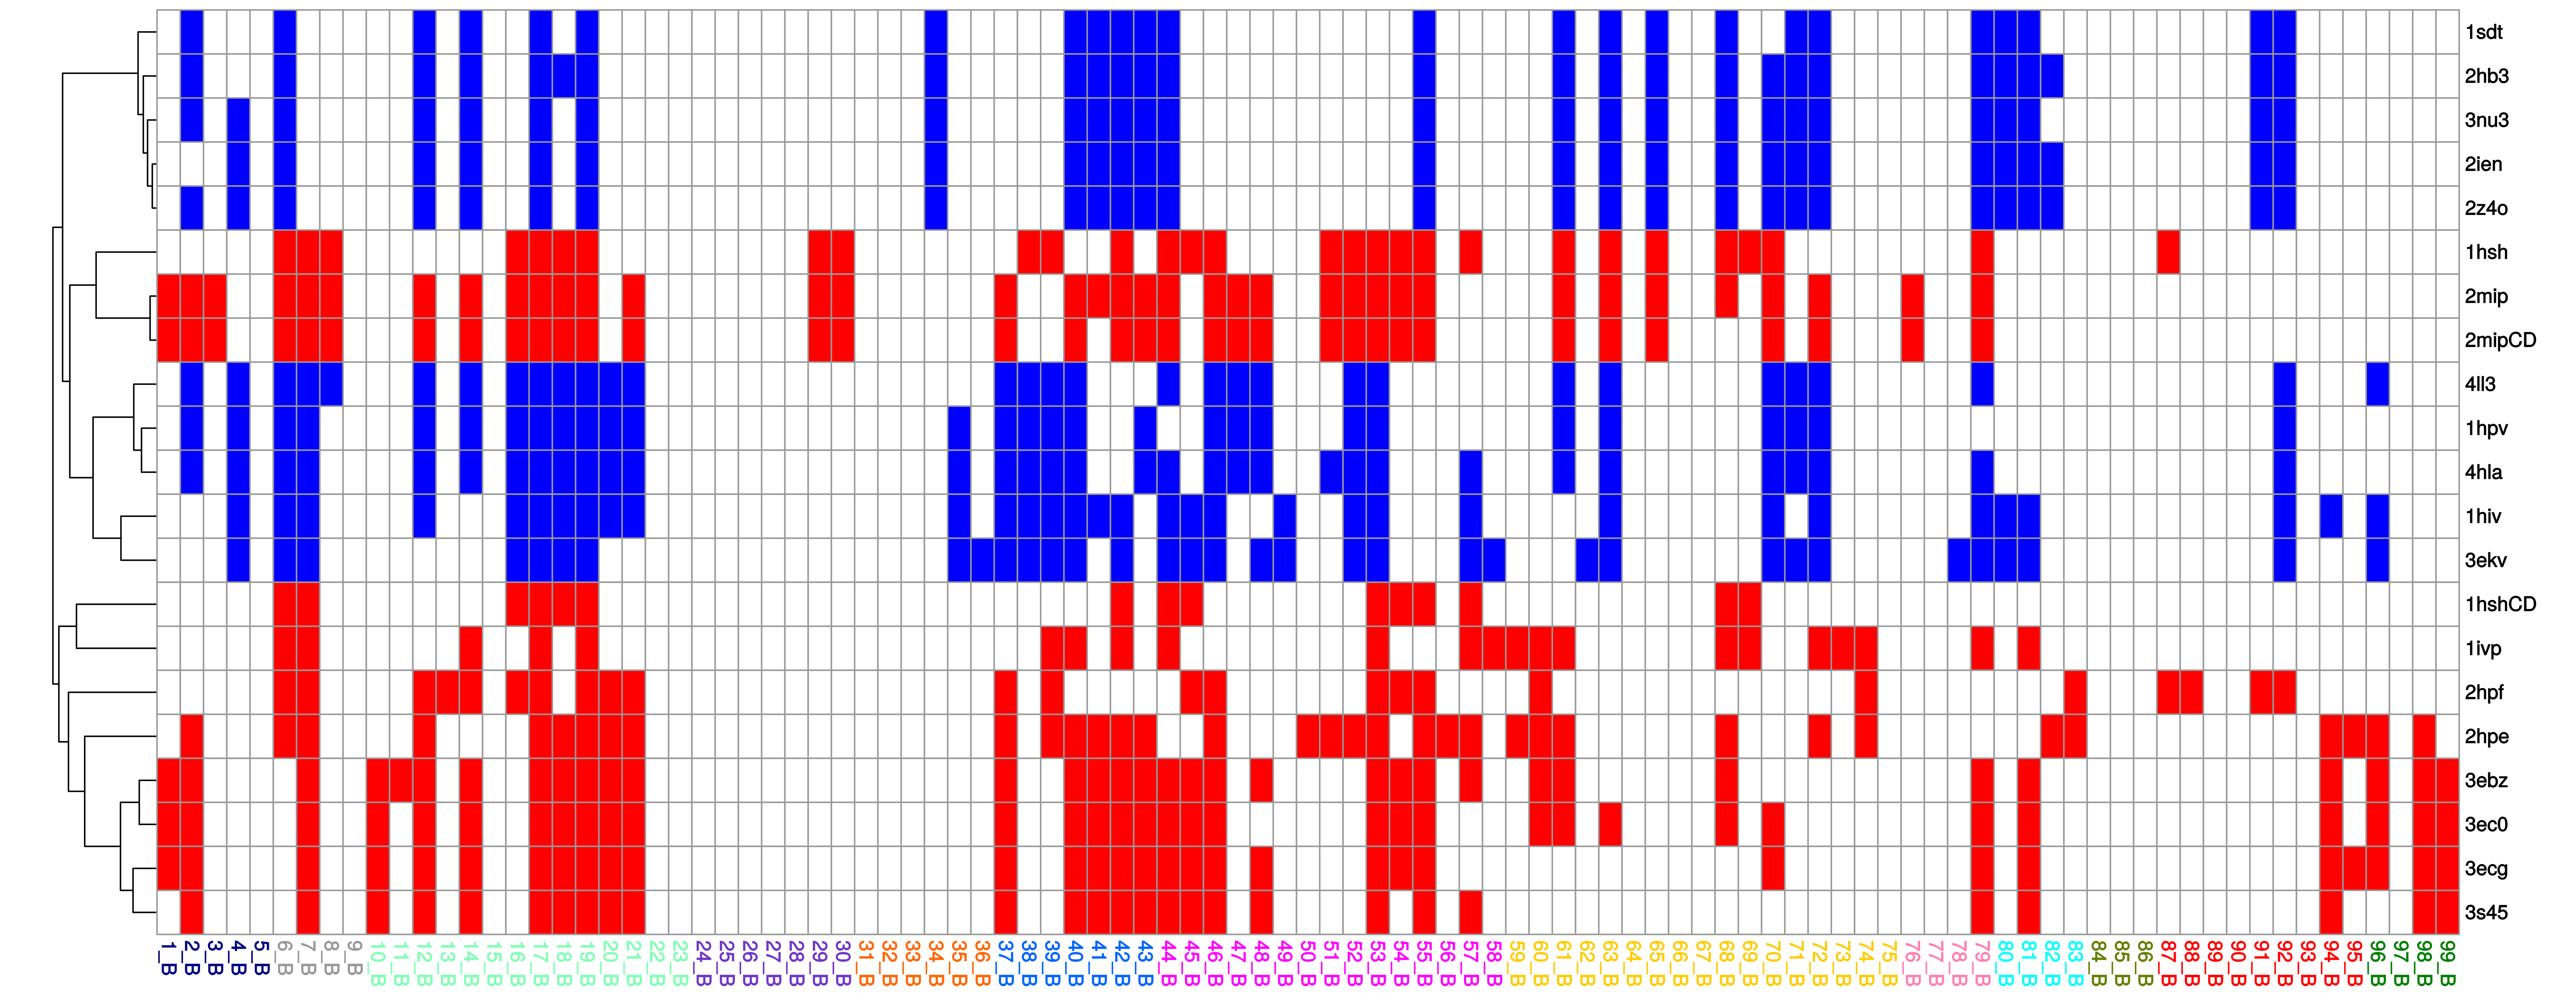


**FIGURE S7. Residues of chain B involved in crystal packing in PR1 and PR2.** PRs are presented in lines, and residues are presented in columns. Residues involved in crystal packing extracted from the PR1 and PR2 structures are coloured in blue and red, respectively. Residues are coloured according to the PR regions (see Figure 1 for the legend). Proteins were classified according to their residues involved in crystal packing using a binary distance and the complete aggregation method.


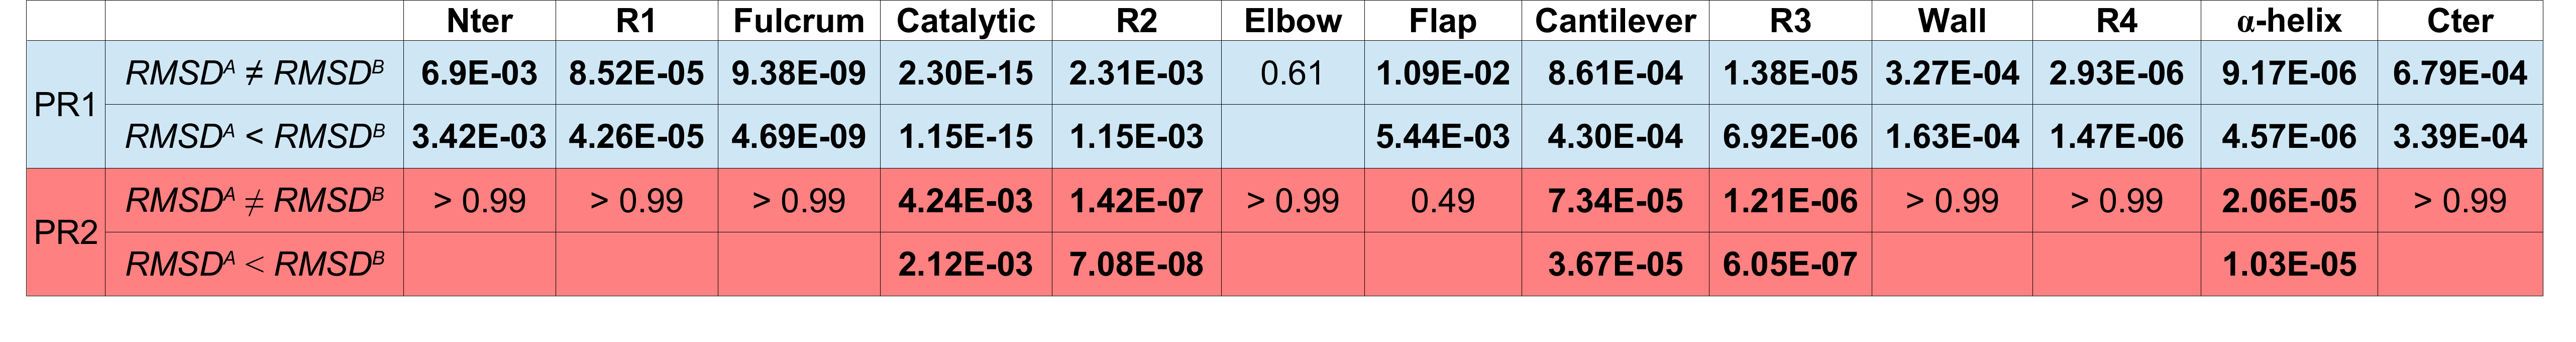


**TABLE S2~~.~~ Asymmetry for the 13 regions of both PRs in terms of changes in intra-variability in chains A and B.** The first two lines (resp. the two last lines) of the table provide the p-value of the t-tests, allowing comparison of the *RMSDPR1* value (resp. RMSDPR2 value) computed using region fragments extracted from chain A of PR1 (resp. PR2), denoted *RMSDA*, with the *RMSDPR1* value (resp. RMSDPR2 value) computed using region fragments extracted from chain B of PR1 (resp. PR2), denoted *RMSDB*. T-tests were performed using the two-sided alternative hypothesis (*RMSDA* ≠ *RMSDB*) and less alternative hypothesis (*RMSDA* < *RMSDB*).
